# Supplementary material for: Identification of an N-acetylneuraminic acid-presenting bacteria isolated from a human microbiome
Source: PubMed Central journal article supplement (PMC7910532; doi:10.1038/s41598-021-83875-w), 2021-02-26
Supplement: 41598_2021_83875_MOESM1_ESM.pdf [file 41598_2021_83875_MOESM1_ESM.pdf]

## **Supplementary Information**

### **Identification of an N-acetylneuraminic acid presenting-bacteria isolated from a human microbiome**

Zhen Han<sup>1</sup>, Peter S. Thuy-Boun<sup>1</sup>, Wayne Pfeiffer<sup>2</sup>, Vincent F. Vartabedian<sup>3</sup>, Ali Torkamani<sup>4,5</sup>, John R. Teijaro<sup>3</sup>, Dennis W. Wolan<sup>1,5</sup>

<sup>1</sup>Department of Molecular Medicine, The Scripps Research Institute, La Jolla, CA 92037

<sup>2</sup>San Diego Supercomputer Center, University of California, San Diego, La Jolla CA 92093

<sup>3</sup>Department of Immunology and Microbiology, The Scripps Research Institute, La Jolla, CA 92037

<sup>4</sup>Scripps Research Translational Institute, The Scripps Research Institute, La Jolla, CA 92037

<sup>5</sup>Department of Integrative Structural and Computational Biology, The Scripps Research Institute, La Jolla, CA 92037

### Supplementary Figures and Tables

- Fig. 1.** Dose-dependent labeling of H2 cultured microbiome sample.
- Fig. 2.** Sia9N<sub>3</sub> metabolic labeling of microbiota H2 competed with Neu5Ac and removed by a microbial sialidase BT-0455.
- Fig. 3.** 16S rDNA sequencing of primary and cultured microbiome samples.
- Fig. 4.** Sia9N<sub>3</sub> incorporation by *E. coli*-K12 (MG1655) and the newly isolated *E. coli* strain.
- Fig. 5.** Sequence alignment of ZH-C2\_04397 to other *E. coli* proteins.
- Fig. 6.** Sequence alignment of ZH-C2\_04599 to other *E. coli* proteins.

### Supp. Table 1 7 tabs

**Supplementary Table 1 legend: Additional bioinformatic data analyses of *E. coli* genome composition.** Related to Figure 6. Tab 1: *E. coli* genome assembly statistics and comparisons to reference strains. Tab 2: List of low-homology and unique *E. coli* ZH-C2 genes relative to K-12 MG1655. Tab 3: Biological process, molecular function, and cellular component GO Terms associated with unique *E. coli* genomes. Tab 4: List of low-homology and unique *E. coli* ZH-C2 genes relative to UMEA 3174-1. Tab 5: List of low-homology and unique *E. coli* ZH-C2 genes relative to VR50. Tab 6: List of low-homology and unique *E. coli* ZH-C2 genes relative RefSeq collection. Low homology hit proteins are best match spans with <70% of query protein length and/or <90% positive identity rate. Tab 7: List of genes and protein products of ZH-C2.

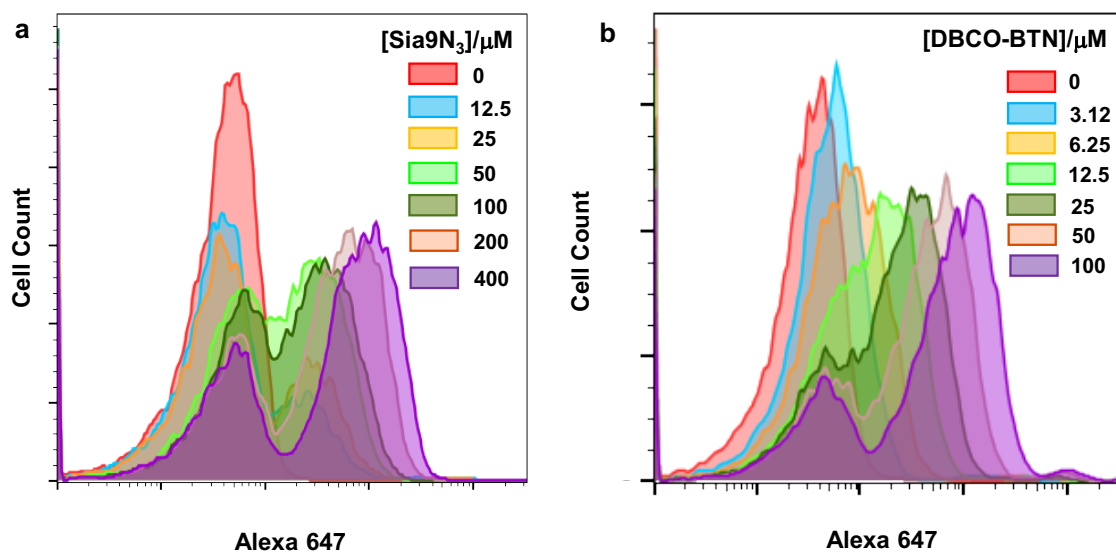

**Fig. 1.** Sia9N<sub>3</sub> (a) and DBCO-BTN (b) dose-dependent labeling of H2 cultured microbiome sample.

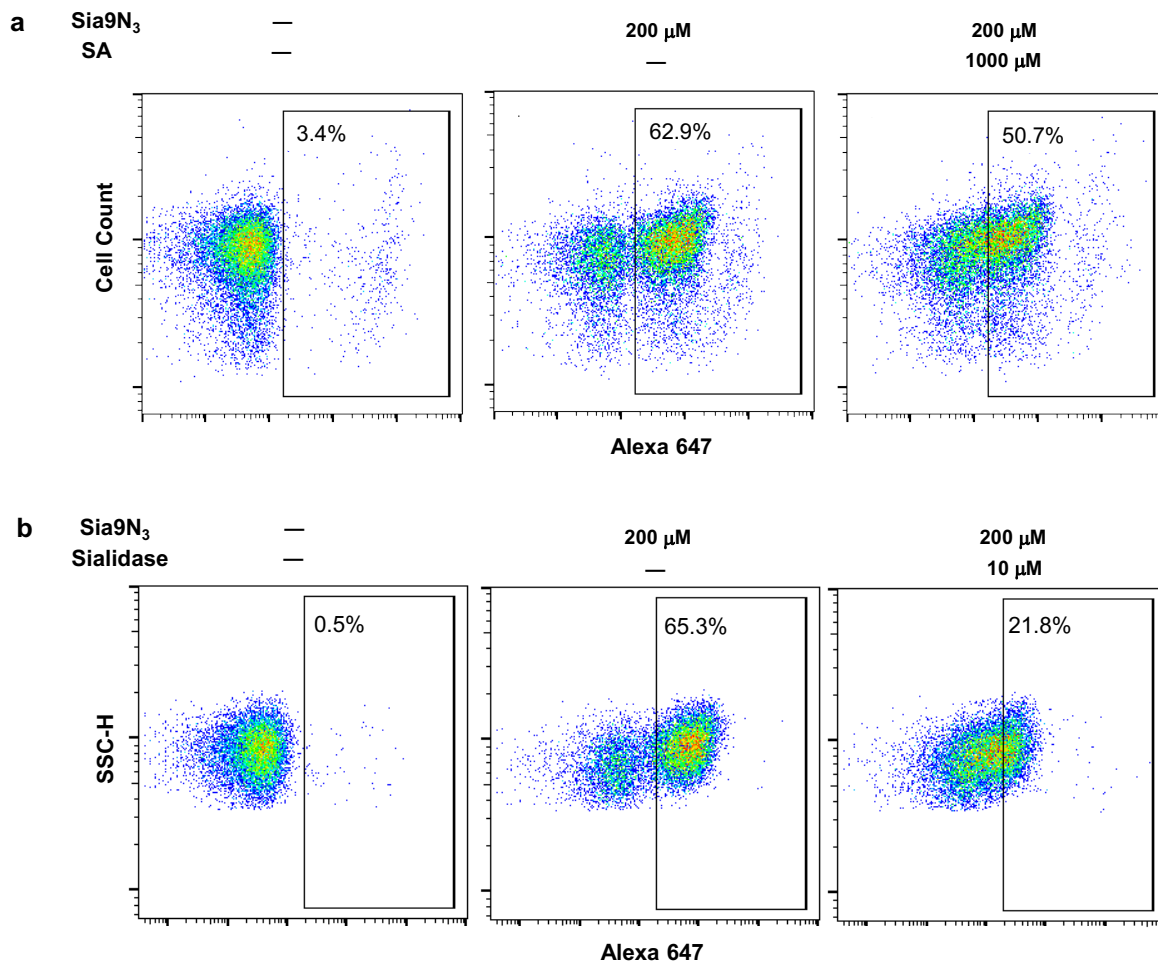

**Fig. 2. a** Sia9N<sub>3</sub> metabolic labeling of microbiome H2 competed with Neu5Ac. **b** Sia9N<sub>3</sub> metabolic labeling is partially removed by a microbial sialidase BT-0455.

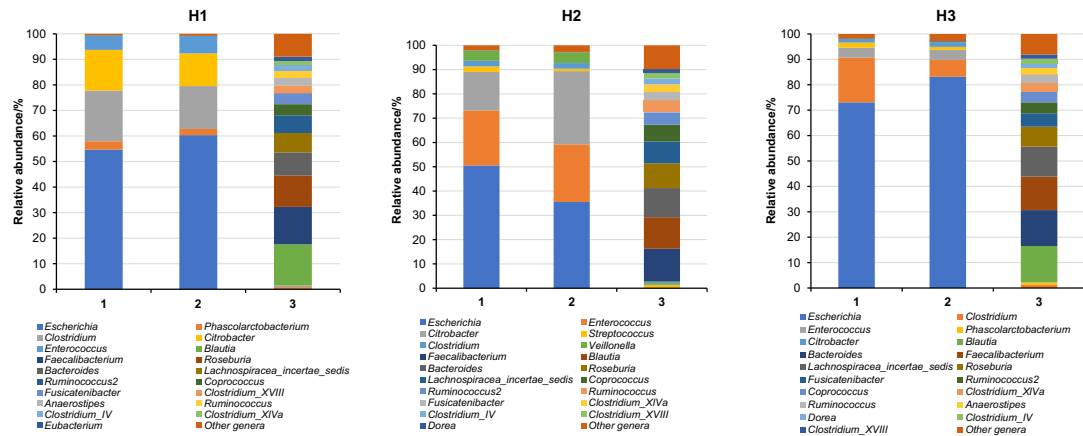

**Fig. 3. 16S rRNA gene sequencing revealed taxonomic composition of cultured and primary microbiomes in the presence and absence of 200  $\mu$ M Sia9N<sub>3</sub>.** Cultured human microbiome samples H1-H3 were all tested, column 1: microbiome cultured without Sia9N<sub>3</sub>, column 2: microbiome cultured with Sia9N<sub>3</sub>, 3: uncultured fecal microbiome samples.

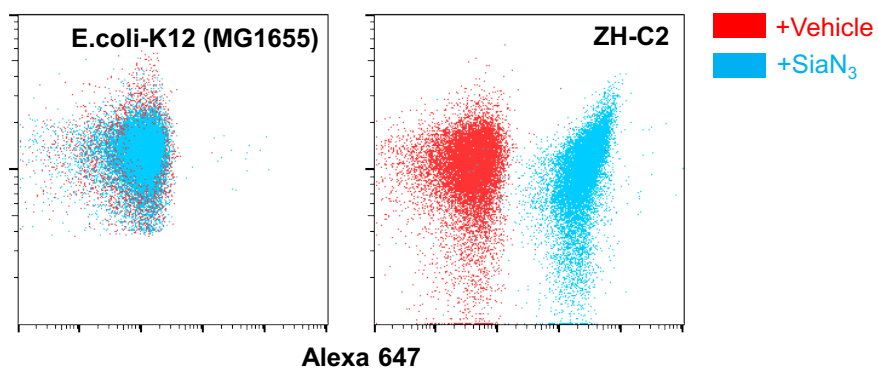

**Fig. 4.** Test of Sia9N<sub>3</sub> incorporation by *E. coli*-K12 (MG1655) and the newly isolated *E. coli* strain ZH-C2.

ZH-C2\_04397 N-terminus:  
autoinducer-2-kinase

ZH-C2\_04397 C-terminus:  
autotransporter barrel lipoprotein  
with C-terminal HipA Ser/Thr kinase

ZH-C2\_04397  
WP\_087634241 1 MARLFTLSSEKTYLMLADAGTGRVAVFDLQSGQIAVGOAEMRRLAVDPVGSMEFPLN  
1  
1  
04397 61 KHMQLACRCHQALNMAQIAPEYIAVAGSASHREGIVLTHNREGAPIMACANVDARAARAV  
WP\_087634241 61  
61  
04397 121 SELKELNHTFENEVYRATGQTLALSAIPRLMLAHRSDIYRQASTIMISDMLATHLS  
WP\_087634241 121  
121  
04397 181 GELAVDPHAGTGLDLDITRDWPKFALDMAGLRADLSPVKESTGLLVSSQAARLCC  
WP\_087634241 181  
181  
04397 241 LKAGTFFVVGQDVLGCLGVVFAQTAVLGGTFQGVVLAAPVDPFPHNVRVPHV  
WP\_087634241 241  
241  
04397 301 IPGNVQARSIPFFTLNTHMFRDAPCAEKLALRELGIDITLLEMAHVRVPPGSGVGNH  
WP\_087634241 301  
301  
04397 361 IPFDRNRKFTWYHAAPSINLSIDDPKCNKATLFRALENAAIVSACNLQIADFSNIFP  
WP\_087634241 361  
361  
04397 421 SELVFAGGSKQLMSQILADVSGLPVIVVKEATALGCATAAGVCAQIPSSHAGTGR  
WP\_087634241 421  
421  
04397 481 DVNERTSPPDPKRELGLAARGVEAADAGPITATKVEFLGEGVFPNHTNSDAGTQ  
WP\_087634241 481  
481  
04397 541 FAGVAQLKSTFLEDRDAAALTRAMLQSDSEHTSVKVGSSIGLANNQGITPDTDI  
WP\_087634241 541  
541  
04397 601 PAATLAEQIISVDLTVVAGDITMKGRNIVQNGQDVLDPKPHNPNMNPITLNL  
WP\_087634241 601  
601  
04397 661 EDDSSVGVVLKQAVTISGGELTLRLDGDVEADKTLIAQNGTVVAEGDYQRLIT  
WP\_087634241 661  
661  
04397 721 APGCLVYVTKKALNIGGKLTAEHGGATGATADMSAKTGGGLAINTVRSLSN  
WP\_087634241 721  
721  
04397 781 GQNDYQAVIYVQHTLRDADGALNTRELINSHAAIVLNGSTVETFTQHGSTVLF  
WP\_087634241 781  
781  
04397 841 KEGALTVNKGISQGLTGGQNLVNGVGTALTEGLNARYNALTSPNARELNDQGL  
WP\_087634241 841  
841  
04397 901 RQNIANDGLLTKPDLLEISDRSVAQVTLIPDETVTFINAMEKLEAELEVLTA  
WP\_087634241 901  
901  
04397 961 ADIFLGHIRENDRFVSAQAKTALLIGMDCIPKGIPTETIILKIPLOEGRPA  
WP\_087634241 961  
961  
04397 1021 LDLGQSDMEVYCLLAKELGLMVPDAEIKAGVRAVAVERPDRRNARTVLLLPD  
WP\_087634241 1021  
1021  
04397 1081 DHCQTFGLPSVKYTESDGGPIARINAFPLMGSSEALKDRYDFMKFQVFWLIGATD  
WP\_087634241 1081  
1081  
04397 1141 NFSVFIQAGSRYLTFPFDIISAPVVGQGTGHI  
WP\_087634241 1141  
1141

ZH-C2\_04397  
WP\_001405865 1 NBRITVYHWCTLQVFPACBELTRAQRQSEVTVLRSSGLTTFEELFLVGLLALSGSA  
1  
1  
04397 61 GAELEVNDQITRIQTVATDQAVLQKQVTLVLAQGRSGLTITVTVVQARDEQET  
WP\_001405865 61  
61  
04397 121 VNVLGGTNRLYDGGNARPLVVGSGTGLTIKQKHVDGGLTLGSGTGGVTVNVEGE  
WP\_001405865 121  
121  
04397 181 MARLFTLSSEKTYLMLADAGTGRVAVFDLQSGQIAVGOAEMRRLAVDPVGSMEFPLN  
WP\_001405865 181  
181  
04397 237 DSVLTFEASSTGLALDAGTGRVAVFDLQSGQIAVGOAEMRRLAVDPVGSMEFPLN  
WP\_001405865 237  
237  
04397 274 TQIGLQVGGDQDGLTTRDWPKALDMAGLRADLSPVKESTGLLVSSQAARLCC  
WP\_001405865 274  
274  
04397 334 RLLLAHRSDIYRQASTITMISDMLATHLS...GTAADPSNAGTGLDITTRDKK  
WP\_001405865 334  
334  
04397 381 PALDQAGLRAQILDPVKESTGLLVSSQAARLCCGLKATPFFVGGDGLDITTRDKK  
WP\_001405865 381  
381  
04397 433 RPAQTLAQLTQVGVVLAAPVDPFPHNVRVPHV...GKVFVQDGLDAGRAGIG  
WP\_001405865 433  
433  
04397 485 TLNLMDATSPDVT...VGVNFGSIVVNSGATLSTGQVPIGQNSAKGKIVISTDLSL  
WP\_001405865 485  
485  
04397 545 FDRAPCAEKLALRELGIDITLLEMAHVRVPPGSGVGNH...LLEMA  
WP\_001405865 545  
545  
04397 605 SRKIPFGS...FSDRNRKFTWYHAAPSINLSIDDPKCNKATLFRALENAAIVSACNLQIADFSNIFP  
WP\_001405865 605  
605  
04397 661 RALACALQAD...PSSVPAAGGK...LMSGLDGLP...IPVVK  
WP\_001405865 661  
661  
04397 713 RALACALQAD...PSSVPAAGGK...LMSGLDGLP...IPVVK  
WP\_001405865 713  
713  
04397 769 ALKGGDLNRVQLSSSDKMPFTRATGTFAGVQLKDSFTPLERDNTAALTRAMLQSDS  
WP\_001405865 769  
769  
04397 829 NTSVVGQDSIGGLANNQGITPDTIPATLAEQIISVDLTVVAGDITMKGRNIVQ  
WP\_001405865 829  
829  
04397 889 GQDVLDPFPHNVRVPHV...LLEMAHVRVPPGSGVGNH...LLEMA  
WP\_001405865 889  
889  
04397 949 EYADKTLIAQNGTVVAEGDYQRLITAPGCLVYVTKKALNIGGKLTAEHGGAT  
WP\_001405865 949  
949  
04397 1009 GATADMSAKTGGGLAINTVRSLSNQGNDTQAGTIVQKGLTADAGLGNTRLENI  
WP\_001405865 1009  
1009  
04397 1049 RAAIVDNGSSQVETFTQNGSTVLFKKAALTVNKGQISQELTGGDLNVTGGLAI  
WP\_001405865 1049  
1049  
04397 1129 ROLNARTNALTSPHAEVSLDNTQGLGRGIANDDLLTKPDLLEISDRSVAQVTLIP  
WP\_001405865 1129  
1129  
04397 1189 RDETVTFINAMEKLEAELEVLTAADIPLQGHIRENDRFVSAQAKTALLIGMDCIP  
WP\_001405865 1189  
1189  
04397 1249 DNCIPGIIPTETIILKIPLOEGRPA...DGGVDRVITCLLAKRELWVPAEITKA  
WP\_001405865 1249  
1249  
04397 1309 QHVRALAVRFRDRNARTVLLRQSDHCQTFGLPSVKYTESDGGPIARINAFPLMGS  
WP\_001405865 1309  
1309  
04397 1369 SEALKDRYDFMKFQVFWLIGATDGHAKRFVFIQAGSRYLTFPFDIISAPVVGQGTGHI  
WP\_001405865 1369  
1369  
04397 1429 H  
WP\_001405865 1429  
1429

ZH-C2\_04397 N-terminus:  
autoinducer-2-kinase LsrK  
*E. coli* KTE98

ZH-C2\_04397  
E0V99460 1 MARLFTLSSEKTYLMLADAGTGRVAVFDLQSGQIAVGOAEMRRLAVDPVGSMEFPLN  
1  
1  
04397 61 KHMQLACRCHQALNMAQIAPEYIAVAGSASHREGIVLTHNREGAPIMACANVDARAARAV  
E0V99460 61  
61  
04397 121 SELKELNHTFENEVYRATGQTLALSAIPRLMLAHRSDIYRQASTIMISDMLATHLS  
E0V99460 121  
121  
04397 181 GELAVDPHAGTGLDLDITRDWPKFALDMAGLRADLSPVKESTGLLVSSQAARLCC  
E0V99460 181  
181  
04397 241 LKAGTFFVVGQDVLGCLGVVFAQTAVLGGTFQGVVLAAPVDPFPHNVRVPHV  
E0V99460 241  
241  
04397 301 IPGNVQARSIPFFTLNTHMFRDAPCAEKLALRELGIDITLLEMAHVRVPPGSGVGNH  
E0V99460 301  
301  
04397 361 IPFDRNRKFTWYHAAPSINLSIDDPKCNKATLFRALENAAIVSACNLQIADFSNIFP  
E0V99460 361  
361  
04397 421 SELVFAGGSKQLMSQILADVSGLPVIVVKEATALGCATAAGVCAQIPSSHAGTGR  
E0V99460 421  
421  
04397 481 DVNERTSPPDPKRELGLAARGVEAADAGPITATKVEFLGEGVFPNHTNSDAGTQ  
E0V99460 481  
481  
04397 541 VDMILITDQDKGVHMDAGTVPNAGTISGKTLVNDGLLITASHTADQVQNGSSEVIT  
E0V99460 541  
541  
04397 599 .....LASTNSAGDITLNLKGGDLNRVQLSSSDKMPFTRATGTFAGVQLKDS  
E0V99460 599  
599  
04397 661 RPTLEDRDNTAALTRAMLQSDSSEHTSVKVGSSIGLANNQGITPDTDIIPATLAEQI  
E0V99460 661  
661  
04397 721 SVDLTVVAGDITMKGRNIVQNGQDVLDPKPHNPNMNPITLNLLEDDSSVGVQ  
E0V99460 721  
721  
04397 781 LVRAQTVISGGSGLTLRLDGDVEADKTLIAQNGTVVAEGDYQRLITAPGCLVYV  
E0V99460 781  
781  
04397 841 GLKALNIGGKLTAEHGGATGATADMSAKTGGGLAINTVRSLSNQGNDTQAGT  
E0V99460 841  
841  
04397 901 VQHTLRDADGALGNTRLEINSHAAIVLNGSTVETFTQHGSTVLFKEGALTVNKG  
E0V99460 901  
901  
04397 934 G...GQELTGGQNLVNGVGTALTEGLNARYNALTSPNARELNDQGLRGNANDGL  
E0V99460 934  
934  
04397 971 TLKFDLLEISDRSVAQVTLIPDETVTFINAMEKLEAELEVLTAADIPLQGHIRE  
E0V99460 971  
971  
04397 991 RDNFRVSAQAKTALLIGMDCIPKGIPTETIILKIPLOEGRPA...DGGVDRVITCLLAKRELWVPAEITKA  
E0V99460 991  
991  
04397 1031 TYCLLAKELGLMVPDAEIKAGVRAVAVERPDRRNARTVLLRQSDHCQTFGLPS  
E0V99460 1031  
1031  
04397 1091 SVKYESDGGPIARINAFPLMGSSEALKDRYDFMKFQVFWLIGATDGHAKRFVFIQAGG  
E0V99460 1091  
1091  
04397 1151 SYRLTFPFDIISAPVVGQGTGHI  
E0V99460 1151  
1151

Fig. 5. Unique multi-domain ZH-C2\_04397 with an N-terminal transposase, autotransporter barrel lipoprotein, and C-terminal HipA-like Ser/Thr kinase aligns to single-domain *E. coli* proteins.

### ZH-C2\_04599 N-terminus: transposase (plasmid)

```

ZH-C2_04599 1 MVVEHAGLRQRGPNKSSLHKHLAPDAGLQAPGASLSFAQGSHPFESLDRGIGRGR
ACQ42061 1 MVVEHAGLRQRGPNKSSLHKHLAPDAGLQAPGASLSFAQGSHPFESLDRGIGRGR
04599 61 FETAHRLDQYLELSVIGLDHVEIILHLPVGRLPVQLSFALQFGDRCTIARRFVGIERGRL
ACQ42061 61 FETAHRLDQYLELSVIGLDHVEIILHLPVGRLPVQLSFALQFGDRCTIARRFVGIERGRL
04599 121 FVVLQASQGLAQEPLRCLGAAGRQVEIDRVAPLVDCPVQVGPLAPHLDVGFIQAPARIK
ACQ42061 121 FVVLQASQGLAQEPLRCLGAAGRQVEIDRVAPLVDCPVQVGPLAPHLDVGFIQAPARIK
04599 181 ATPPEPAQPLLHLRGVALDPAIDRRMVDNRNAAFRQHFLKVAIADRIATIPARRPQDHITL
ACQ42061 181 ATPPEPAQPLLHLRGVALDPAIDRRMVDNRNAAFRQHFLKVAIADRIATIPARRPQDHITL
04599 241 EMAPLEIRHRSVRPISAKHAQASRFLOQSPPEVHVQLHQKGMISLSPPTICNSARLMA
ACQ42061 241 EMAPLEIRHRSVRPISAKHAQASRFLOQSPPEVHVQLHQKGMISLSPPTICNSARLMA
04599 301 VLGAICGTAGVALLVLTNPAALDPVGAAGLAGAVSNAPGTVLTRKMQPPVPLLTFTAW
ACQ42061 301 VLGAICGTAGVALLVLTNPAALDPVGAAGLAGAVSNAPGTVLTRKMQPPVPLLTFTAW
04599 361 LAAGGLLVPVALVDFDPPIMPPTGTVLGLANLGLIGAGLTYFLNFRGISRLEPTVVSL
ACQ42061 361 LAAGGLLVPVALVDFDPPIMPPTGTVLGLANLGLIGAGLTYFLNFRGISRLEPTVVSL
04599 421 GFLSPGTAVLLGWFLDQTLQIIGVLLVIGSINLWQSRNRTPRARIACRSK
ACQ42061 421 GFLSPGTAVLLGWFLDQTLQIIGVLLVIGSINLWQSRNRTPRARIACRSK
    
```

### ZH-C2\_04599 C-terminus: EamA transporter

```

ZH-C2_04599 1 MVVEHAGLRQRGPNKSSLHKHLAPDAGLQAPGASLSFAQGSHPFESLDRGIGRGR
WP_175065871 1 MVVEHAGLRQRGPNKSSLHKHLAPDAGLQAPGASLSFAQGSHPFESLDRGIGRGR
04599 61 FETAHRLDQYLELSVIGLDHVEIILHLPVGRLPVQLSFALQFGDRCTIARRFVGIERGRL
WP_175065871 61 FETAHRLDQYLELSVIGLDHVEIILHLPVGRLPVQLSFALQFGDRCTIARRFVGIERGRL
04599 121 FVVLQASQGLAQEPLRCLGAAGRQVEIDRVAPLVDCPVQVGPLAPHLDVGFIQAPARIK
WP_175065871 121 FVVLQASQGLAQEPLRCLGAAGRQVEIDRVAPLVDCPVQVGPLAPHLDVGFIQAPARIK
04599 181 ATPPEPAQPLLHLRGVALDPAIDRRMVDNRNAAFRQHFLKVAIADRIATIPARRPQDHITL
WP_175065871 181 ATPPEPAQPLLHLRGVALDPAIDRRMVDNRNAAFRQHFLKVAIADRIATIPARRPQDHITL
04599 241 EMAPLEIRHRSVRPISAKHAQASRFLOQSPPEVHVQLHQKGMISLSPPTICNSARLMA
WP_175065871 241 EMAPLEIRHRSVRPISAKHAQASRFLOQSPPEVHVQLHQKGMISLSPPTICNSARLMA
04599 300 AVLGAICGTAGVALLVLTNPAALDPVGAAGLAGAVSNAPGTVLTRKMQPPVPLLTFTAW
WP_175065871 52 AVLGAICGTAGVALLVLTNPAALDPVGAAGLAGAVSNAPGTVLTRKMQPPVPLLTFTAW
04599 360 QLAAGGLLVPVALVDFDPPIMPPTGTVLGLANLGLIGAGLTYFLNFRGISRLEPTVVSL
WP_175065871 112 QLAAGGLLVPVALVDFDPPIMPPTGTVLGLANLGLIGAGLTYFLNFRGISRLEPTVVSL
04599 420 LGFLSPGTAVLLGWFLDQTLQIIGVLLVIGSINLWQSRNRTPRARIACRSK
WP_175065871 172 LGFLSPGTAVLLGWFLDQTLQIIGVLLVIGSINLWQSRNRTPRARIACRSK
    
```

**Fig. 6.** Unique multi-domain ZH-C2\_04599 with an N-terminal transposase and C-terminal EamA transporter aligns to single-domain *E. coli* proteins.
